# Supplementary material
Source: ML conference proceedings conference paper supplement (https://openreview.net/forum?id=yvxDJ8eyBu)
Supplement: supplementary_material [file attachment]

## A Attribute Information

Table 8 shows the detailed pre-defined musical attribute values. The value *NA* of each attribute refers to that this attribute is not mentioned in the text. Objective attributes can be extracted from MIDI files with heuristic algorithms and subjective attributes are collected from existing datasets, as shown in Table 9.

Table 8: Detailed attribute values.

| Attributes          | Values                                                                                                                                                                                                                                                                                                       |
|---------------------|--------------------------------------------------------------------------------------------------------------------------------------------------------------------------------------------------------------------------------------------------------------------------------------------------------------|
| Instrument          | 28 instruments: piano, keyboard, percussion, organ, guitar, bass, violin, viola, cello, harp, strings, voice, trumpet, trombone, tuba, horn, brass, sax, oboe, bassoon, clarinet, piccolo, flute, pipe, synthesizer, ethnic instrument, sound effect, drum. Each instrument: 0: played, 1: not played, 2: NA |
| Pitch Range         | 0-11: octaves, 12: NA                                                                                                                                                                                                                                                                                        |
| Rhythm Danceability | 0: danceable, 1: not danceable, 2: NA                                                                                                                                                                                                                                                                        |
| Rhythm Intensity    | 0: serene, 1: moderate, 2: intense, 3: NA                                                                                                                                                                                                                                                                    |
| Bar                 | 0: 1-4 bars, 1: 5-8 bars, 2: 9-12 bars, 3: 13-16 bars, 4: NA                                                                                                                                                                                                                                                 |
| Time Signature      | 0: 4/4, 1: 2/4, 2: 3/4, 3: 1/4, 4: 6/8, 5: 3/8, 6: other tempos, 7: NA                                                                                                                                                                                                                                       |
| Key                 | 0: major, 1: minor, 2: NA                                                                                                                                                                                                                                                                                    |
| Tempo               | 0: slow ( $\leq 76$ BPM), 1: moderato (76-120 BPM), 2: fast ( $\geq 120$ BPM), 3: NA                                                                                                                                                                                                                         |
| Time                | 0: 0-15s, 1: 15-30s, 2: 30-45s, 3: 45-60s, 4: >60s, 5: NA                                                                                                                                                                                                                                                    |
| Artist              | 0-16 artists: Beethoven, Mozart, Chopin, Schubert, Schumann, J.S. Bach, Haydn, Brahms, Handel, Tchaikovsky, Mendelssohn, Dvorak, Liszt, Stravinsky, Mahler, Prokofiev, Shostakovich, 17: NA                                                                                                                  |
| Genre               | 21 genres: new age, electronic, rap, religious, international, easy listening, avant garde, RNB, latin, children, jazz, classical, comedy, pop, reggae, stage, folk, blues, vocal, holiday, country, symphony. Each genre: 0: with, 1: without, 2: NA                                                        |
| Emotion             | 0-3: the 1-4 quadrant in Russell’s valence-arousal emotion space<br>4: NA                                                                                                                                                                                                                                    |

Table 9: Extraction methods and sources of each attributes.

| Type       | Attribute           | Extraction Method                                                                        |
|------------|---------------------|------------------------------------------------------------------------------------------|
| Objective  | Instrument          | directly extracted from MIDI                                                             |
|            | Pitch range         | calculated based on the pitch range                                                      |
|            | Rhythm danceability | judged with the ratio of downbeat                                                        |
|            | Rhythm intensity    | judged with the average note density                                                     |
|            | Bar                 | directly extracted from MIDI                                                             |
|            | Time signature      | directly extracted from MIDI                                                             |
|            | Key                 | judged with the note pitches based on musical rules                                      |
|            | Tempo               | directly extracted from MIDI                                                             |
| Subjective | Time                | derived from the time signature and the number of bars                                   |
|            | Artist              | provided by a classical music dataset in MMD [36]                                        |
|            | Genre               | provided by MAGD <sup>13</sup> , a classical music dataset in MMD [36] and Symphony [39] |
|            | Emotion             | provided by EMOPIA [16] and the emotion-gen dataset                                      |

## B Experiments

### B.1 User study with baselines

In the user study, participants were provided with generated music samples along with their corresponding textual prompts. For each text description, each model (i.e., BART-base, GPT-4, MuseLM) generated three different music clips. In each questionnaire, three samples generated with the same

text conditions were randomly picked from samples generated by BART-base, GPT-4, and MuseLM respectively as a group. Each participant was asked to evaluate 7 groups for comparison. Three subjective metrics, musicality, controllability, and an overall score, are rated on a scale of 1 (lowest) to 5 (highest). The participants were first requested to evaluate their music profession level, as depicted in Table 10. To ensure the reliability of the assessment, only individuals with at least music profession level 3 were selected, resulting in a total of 19 participants. Secondly, they were instructed to independently evaluate two separate metrics: musicality and controllability, ensuring that scoring for one metric did not influence the other. They are also asked to give an overall score to evaluate the generated music comprehensively. For the collected results, we computed the mean and variance for each metric. The results can be found in Table 4.

Table 10: Music Profession Level

| Level | Description                                                                                                                                                                                 |
|-------|---------------------------------------------------------------------------------------------------------------------------------------------------------------------------------------------|
| 1     | I rarely listen to music.                                                                                                                                                                   |
| 2     | I haven't received formal training in playing or music theory, but I often listen to music and have my preferred styles, musicians, and genres.                                             |
| 3     | I have some basic knowledge of playing an instrument or music theory, but I haven't received formal training.                                                                               |
| 4     | I haven't received formal training, but I have self-taught myself some aspects such as music theory or playing an instrument. I am at an amateur level (e.g., CCOM piano level 6 or above). |
| 5     | I have received professional training in a systematic manner.                                                                                                                               |

## B.2 Objective Comparison with baselines

In this section, we introduce how to calculate the objective metric, the average sample-wise accuracy (ASA), in Table 4. As for MuseLM, ten music clips are generated per prompt and we report ASA of them among the overall standard test set. Since it is labor-intensive to leverage GPT-4 with the official web page, we only guide GPT-4 to produce five music clips per prompt and calculate the ASA of 21 prompts randomly sampled from the standard test set. Besides, we utilize the released text-tune BART-base checkpoint<sup>14</sup> to generate five music clips per prompt and report the ASA of 44 prompts randomly chosen from the standard test set.

## B.3 Text-to-attribute understanding

As shown in Table 11, all attribute control accuracy is close or equal to 100%, which indicates our model with multiple classification heads in the text-to-attribute understanding stage performs quite well.

## B.4 Details of Analysis on Attribute-to-music Generation

**Attribute Control Accuracy** We report the control accuracy for each attribute on the test dataset, as shown in Table 12. The average attribute control accuracy of 80.42%, which provides substantial evidence for the model's proficiency in effectively controlling music generation using music attributes.

**Study on Control Methods** To verify the effectiveness of the control method in the attribute-to-music generations stage, we compare *Prefix Control* with two methods: *Embedding* and *Conditional LayerNorm*. For efficiency, we conducted this study on reduced-size models as follows: The backbone model of this experiment is a 6-layer Linear Transformer with causal attention. The hidden size is 512 and the FFN hidden size is 2048. The other experiment configuration is the same as Section 4.1. Since the control accuracy of objective attributes can be easily calculated, we only need to measure the controllability of each subjective attribute in listening tests. The control accuracy of each attribute is shown in Table 12. Finally, the average attribute control accuracy can be calculated based on the accuracy results from both types of attributes. To measure the controllability of subjective attributes

<sup>14</sup><https://huggingface.co/sander-wood/text-to-music>

Table 11: Attribute control accuracy (%) of the text-to-attribute understanding model. I: Instrument.

| Attribute    | Accuracy(%) | Attribute            | Accuracy(%) | Attribute           | Accuracy(%) |
|--------------|-------------|----------------------|-------------|---------------------|-------------|
| I_piano      | 100.00      | I_clarinet           | 99.92       | Genre_comedy_spoken | 100.00      |
| I_keyboard   | 99.92       | I_piccolo            | 99.94       | Genre_pop_rock      | 100.00      |
| I_percussion | 100.00      | I_flute              | 99.62       | Genre_reggae        | 100.00      |
| I_organ      | 100.00      | I_pipe               | 100.00      | Genre_stage         | 100.00      |
| I_guitar     | 99.92       | I_synthesizer        | 100.00      | Genre_folk          | 100.00      |
| I_bass       | 99.84       | I_ethnic_instruments | 99.98       | Genre_blues         | 100.00      |
| I_violin     | 99.92       | I_sound_effects      | 99.98       | Genre_vocal         | 100.00      |
| I_viola      | 99.96       | I_drum               | 100.00      | Genre_holiday       | 100.00      |
| I_cello      | 99.92       | Genre_new_age        | 99.98       | Genre_country       | 100.00      |
| I_harp       | 100.00      | Genre_electronic     | 100.00      | Genre_symphony      | 100.00      |
| I_strings    | 99.96       | Genre_rap            | 100.00      | Bar                 | 100.00      |
| I_voice      | 99.70       | Genre_religious      | 100.00      | Time Signature      | 100.00      |
| I_trumpet    | 99.96       | Genre_international  | 100.00      | Key                 | 100.00      |
| I_trombone   | 99.94       | Genre_easy_listening | 100.00      | Tempo               | 99.84       |
| I_tuba       | 100.00      | Genre_avant_garde    | 100.00      | Octave              | 100.00      |
| I_horn       | 99.94       | Genre_rmb            | 100.00      | Emotion             | 99.80       |
| I_brass      | 100.00      | Genre_latin          | 100.00      | Time                | 100.00      |
| I_sax        | 99.84       | Genre_children       | 100.00      | Rhythm Danceability | 100.00      |
| I_oboe       | 99.94       | Genre_jazz           | 100.00      | Rhythm Intensity    | 99.88       |
| I_bassoon    | 99.96       | Genre_classical      | 100.00      | Artist              | 100.00      |

Table 12: Accuracy (%) of each attribute for attribute-to-music generation. I: Instrument.

| Attribute    | Accuracy(%) | Attribute            | Accuracy(%) |
|--------------|-------------|----------------------|-------------|
| I_piano      | 96.20       | I_clarinet           | 90.63       |
| I_keyboard   | 79.55       | I_piccolo            | 86.67       |
| I_percussion | 65.19       | I_flute              | 86.73       |
| I_organ      | 80.55       | I_pipe               | 70.73       |
| I_guitar     | 91.81       | I_synthesizer        | 78.28       |
| I_bass       | 93.11       | I_ethnic_instruments | 77.69       |
| I_violin     | 87.88       | I_sound_effects      | 51.74       |
| I_viola      | 92.03       | I_drum               | 95.96       |
| I_cello      | 86.50       | Bar                  | 71.80       |
| I_harp       | 74.87       | Time Signature       | 99.14       |
| I_strings    | 86.08       | Key                  | 57.42       |
| I_voice      | 75.82       | Tempo                | 92.71       |
| I_trumpet    | 84.86       | Octave               | 61.56       |
| I_trombone   | 84.64       | Time                 | 65.82       |
| I_tuba       | 93.08       | Rhythm Danceability  | 88.04       |
| I_horn       | 80.13       | Rhythm Intensity     | 80.47       |
| I_brass      | 77.27       | Genre                | 73.08       |
| I_sax        | 81.74       | Emotion              | 69.45       |
| I_oboe       | 85.23       | Artist               | 50.03       |
| I_bassoon    | 90.72       |                      |             |

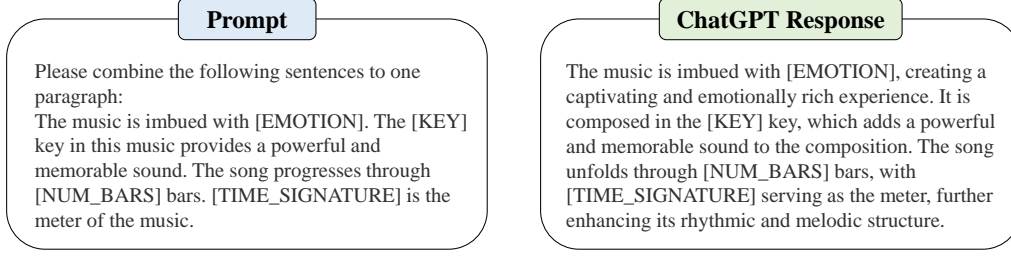

Figure 3: ChatGPT refines concatenated templates in the prompt.

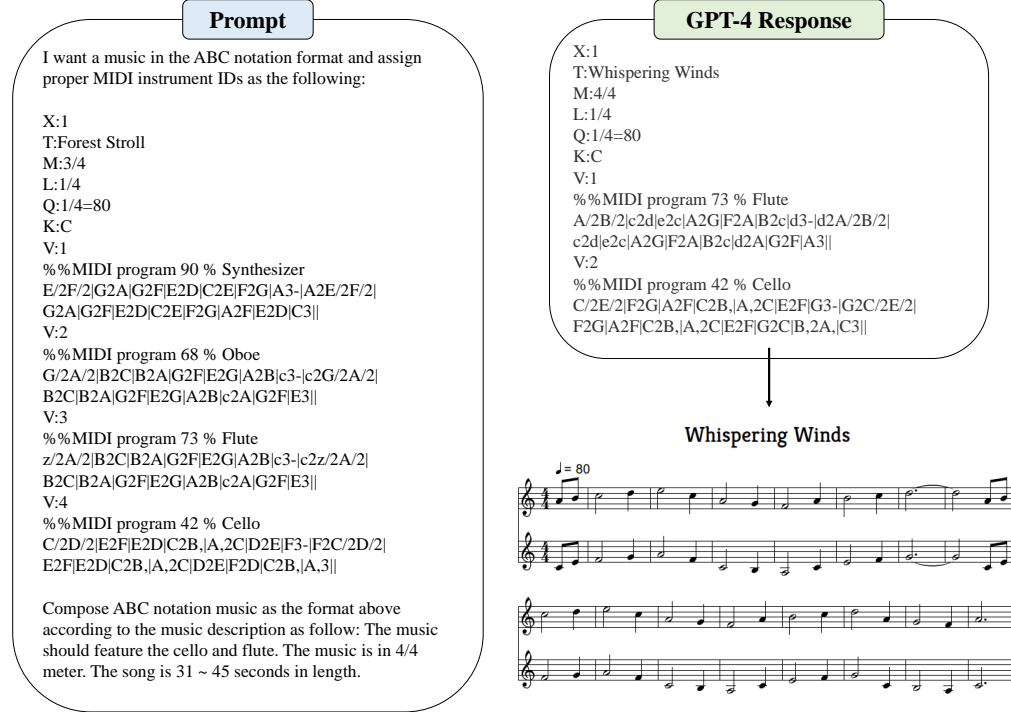

Figure 4: GPT-4 generates ABC notation tunes based on the prompt.

(such as emotion and genre), we invite 12 participants to conduct a listening test. Each participant was provided with 18 music pieces (6 pieces per control method) with corresponding subjective attributes. We asked each participant to answer: 1) Musicality(five-point scale): How similar it sounds to the music composed by a human. 2) Controllability: Does it align with the given attributes. Then we report the musicality and average attribute accuracy score in Table Table 7. The experimental results clearly demonstrate that *Prefix Control* outperforms the other two methods in terms of musicality and controllability.

## B.5 Usage of GPT models

**Refine texts with ChatGPT** As shown in Figure 3, in order to make text descriptions more coherent and fluent, we feed concatenated templates into ChatGPT with a prompt *Please combine the following sentences to one paragraph* and then ChatGPT will give a response containing all templates within a compact paragraph.

501 **Generate ABC notation music with GPT-4** To use the GPT-4 as the baseline method for com-  
502 parison, we design the instruction to guide GPT-4 as shown in Figure 4. Gpt-4 can only generate  
503 symbolic music in ABC notation, so we need to explicitly point out the format. Besides, since GPT-4  
504 can generate various ABC notation formats, some of which cannot be processed by music21, we  
505 provide an ABC notation example, teaching GPT-4 to follow its format. Meanwhile, we use the  
506 prompt, *Compose ABC notation music as the format above according to the music description as*  
507 *follows: [text descriptions]* to let GPT-4 generate music according to the text description and convert  
508 the ABC notations into MIDI for a fair comparison.

## 509 C Limitation

510 This work is mainly about generating symbolic music from text descriptions, which does not consider  
511 long sequence modeling especially. To address this, we can employ Museformer [22] as the backbone  
512 model, which proposes fine- and coarse-grained attention for handling long sequences.

513 The attribute set provided in this work represents only a subset of all music attributes. We aim to  
514 further explore additional attributes to offer a wider range of control options for music generation,  
515 ensuring greater diversity in the creative process.

516 The possibility of regenerating music based on additional text descriptions to assist users in refining  
517 their compositions is an aspect that is worth exploring.
